# Supplementary material for: NeuroWorm: a Long-term Implantable Soft Microfibre for Multimodal Biosensing
Source: Research Square preprint supplement (doi:10.21203/rs.3.rs-3689335/v1), 2023-12-12
Supplement: Supplementary file 1 [file 1c20b303cd8891dd3e5b04d5.docx]

Supplementary Information for

**NeuroWorm: a Long-term Implantable Soft Microfibre for Multimodal Biosensing**

*Ruijie Xie1,2†, Qianhengyuan Yu1†, Dong Li3†, Xu Han2, Xiaolong Xu2, Jianping Huang1, Xiaomeng Zhou1, Hang Zhao1, Xinping Deng1, Qiong Tian1, Qingsong Li1,* *Hanfei Li1, Hairong Zheng1, Guanglin Li1, Meifang Zhu4, Wei Yan4*, Fei Han1*, Tiantian Xu3*, Zhiyuan Liu1**

*Corresponding author: Zhiyuan Liu, zy.liu1@siat.ac.cn; Tiantian Xu, tt.xu@siat.ac.cn; Fei Han, fei.han@siat.ac.cn; Wei Yan, weiyan@dhu.edu.cn*

**The PDF file includes:**

The code for processing electromyography (EMG) signals

**Other Supplementary information for this manuscript include the following:**

Supplementary Video 1.

Fabrication Process of NeuroWorm

Supplementary Video 2.

Implantation of NeuroWorm in an artificial brain under magnetic field

Supplementary Video 3.

Minimally-invasive implantation process of the NeuroWorm

Supplementary Video 4.

Long-term implantable monitoring of intramuscular EMG during movement

The code for processing intramuscular electromyography (EMG) signals is as follows, including filtering the collected EMG signal, plotting the EMG graph, taking a screenshot of a portion of the EMG graph, and processing the central frequency value of the segmented EMG spectrogram:

fs = 2000;

filterRanges = [1 10; 49.5 50.5; 149.5 150.5; 249.5 250.5; 349.5 350.5; 449.5 450.5; 500 1000];

signalIndex = 27;

startpoint = fix(40.83*2e3);

endpoint = fix(42.83*2e3-1);

signal = tableData{:, signalIndex};

subsignal = tableData{startpoint:endpoint, signalIndex};

sosMatrix = [];

gainVector = [];

for i = 1:size(filterRanges, 1)

filt_temp = designfilt('bandstopiir', 'FilterOrder', 4, 'HalfPowerFrequency1', filterRanges(i, 1), 'HalfPowerFrequency2', filterRanges(i, 2), 'SampleRate', fs);

[num, den] = tf(filt_temp);

[sos_temp, gain_temp] = tf2sos(num, den);

sosMatrix = [sosMatrix; sos_temp];

gainVector = [gainVector; gain_temp];

end

filt = dfilt.df2sos(sosMatrix, gainVector);

filteredsubSignal = filter(filt, subsignal);

filteredSignal = filter(filt, signal);

figure;

sublt = 1/fs:1/fs:size(subsignal, 1)/fs;

plot(sublt, filteredsubSignal);

axis([0 max(sublt) -2 2])

set(gca, 'XTick', 0:1:max(sublt))

set(gca, 'YTick', -2:1:2)

title(['Signal ', num2str(signalIndex)]);

ylabel('EMG signal(mv)');

xlabel('t(s)');

figure;

N = length(filteredsubSignal);

freq = (0:N/2-1) * fs / N;

spectrum = abs(fft(filteredsubSignal)/N);

plot(freq, spectrum(1:N/2));

title([' Spectrum plot ', num2str(signalIndex)]);

xlabel('Frequency (Hz)');

ylabel('Amplitude (mV)');

figure;

lt = 1/fs:1/fs:size(signal, 1)/fs;

plot(lt, filteredSignal);

axis([0 max(lt) -2 2])

set(gca, 'XTick', 0:5:max(lt))

set(gca, 'YTick', -2:1:2)

title(['Signal ', num2str(signalIndex)]);

ylabel('EMG signal(mv)');

xlabel('t(s)');

Y = fft(filteredsubSignal);

P2 = abs(Y/N);

P1 = P2(1:N/2+1);

P1(2:end-1) = 2*P1(2:end-1);

f = fs*(0:(N/2))/N;

AF_CF = sum(f'.*P1)/sum(P1);
